# Supplementary material
Source: Springer Nature journal article supplement (https://www.springermedizin.de/resource/supplementary/12873_2008_66_MOESM4_ESM.pdf/9431894)
Supplement: MOESM4 [file 9431894]

**Table 4. Highest level of health care in 2492 episodes of acute poisoning**

|                     | Ambulance <sup>†</sup> |       | Outpatient clinic |       | Hospitals |       | Odds ratio<br>Ambulance<br>vs hospital |           | Odds ratio<br>Outpatient clinic<br>vs hospital |         |
|---------------------|------------------------|-------|-------------------|-------|-----------|-------|----------------------------------------|-----------|------------------------------------------------|---------|
|                     | n                      | %     | n                 | %     | n         | %     | OR                                     | 95% CI    | OR                                             | 95% CI  |
| Age (median years)  | 34                     |       | 37                |       | 36        |       |                                        |           |                                                |         |
| Males               | 516                    | (69)  | 555               | (69)  | 430       | (46)  | 2.6                                    | 2.1–3.2   | 2.7                                            | 2.2–3.3 |
| Females             | 234                    | (31)  | 246               | (31)  | 511       | (54)  | 0.4                                    | 0.3–0.5   | 0.4                                            | 0.3–0.5 |
| Opiates             | 528                    | (70)  | 188               | (23)  | 68        | (7)   | 30.5                                   | 22.8–40.9 | 3.9                                            | 2.9–5.3 |
| Ethanol             | 171                    | (23)  | 439               | (55)  | 161       | (17)  | 1.4                                    | 1.1–1.8   | 5.9                                            | 4.7–7.3 |
| Sedatives           | 13                     | (2)   | 57                | (7)   | 242       | (26)  | 0.05                                   | 0.0–0.1   | 0.2                                            | 0.2–0.3 |
| Other agents        | 21                     | (3)   | 50                | (6)   | 125       | (13)  | 0.2                                    | 0.1–0.3   | 0.4                                            | 0.3–0.6 |
| Other illicit drugs | 9                      | (1)   | 45                | (6)   | 100       | (11)  | 0.1                                    | 0.1–0.2   | 0.5                                            | 0.3–0.7 |
| Paracetamol         | 5                      | (1)   | 7                 | (1)   | 116       | (12)  | 0.05                                   | 0.0–0.1   | 0.06                                           | 0.0–0.1 |
| Antidepressants     | 3                      | (0.4) | 4                 | (0)   | 65        | (7)   | 0.05                                   | 0.0–0.2   | 0.07                                           | 0.0–0.2 |
| Neuroleptics        | 0                      | (0)   | 11                | (1)   | 64        | (7)   |                                        |           | 0.2                                            | 0.1–0.4 |
| Awake               | 332                    | (44)  | 274               | (34)  | 436       | (46)  | 0.9                                    | 0.8–1.1   | 0.6                                            | 0.5–0.7 |
| Somnolent           | 153                    | (20)  | 447               | (56)  | 284       | (30)  | 0.6                                    | 0.5–0.7   | 2.9                                            | 2.4–3.6 |
| Comatose            | 78                     | (10)  | 77                | (10)  | 140       | (15)  | 0.7                                    | 0.5–0.9   | 0.6                                            | 0.5–0.8 |
| Deeply comatose     | 187                    | (25)  | 3                 | (0)   | 81        | (9)   | 3.5                                    | 2.7–4.7   | 0.04                                           | 0.0–0.1 |
| Antidote*           | 367                    | (49)  | 34                | (4)   | 255       | (27)  | 2.6                                    | 2.1–3.2   | 0.1                                            | 0.1–0.2 |
| Total               | 750 <sup>†</sup>       | (100) | 801               | (100) | 941       | (100) |                                        |           |                                                |         |

<sup>†</sup>15 patients dead on site not included

\*The antidote was solely naloxone in ambulances, while only naloxone and flumazenil were included from outpatient clinic and hospitals
